# Supplementary material for: A robust (re-)annotation approach to generate unbiased mapping references for RNA-seq-based analyses of differential expression across closely related species
Source: PubMed Central journal article supplement (PMC4877740; doi:10.1186/s12864-016-2646-x), 2016-05-24

**Published Annotation**

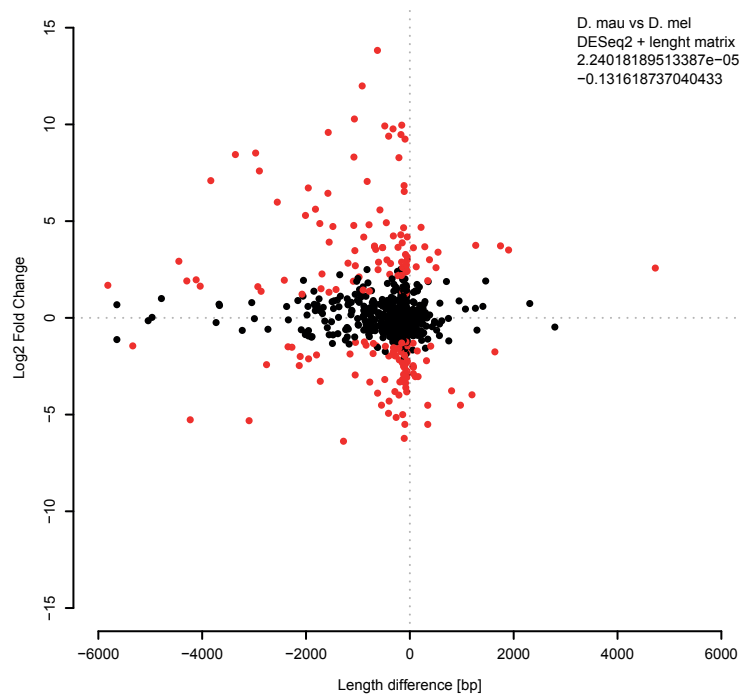

**Published Annotation**

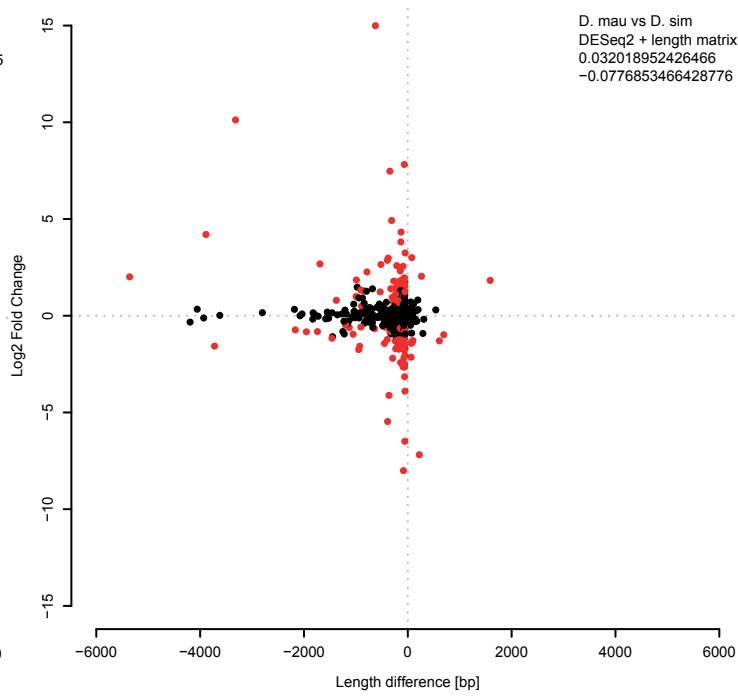

**Direct Annotation**

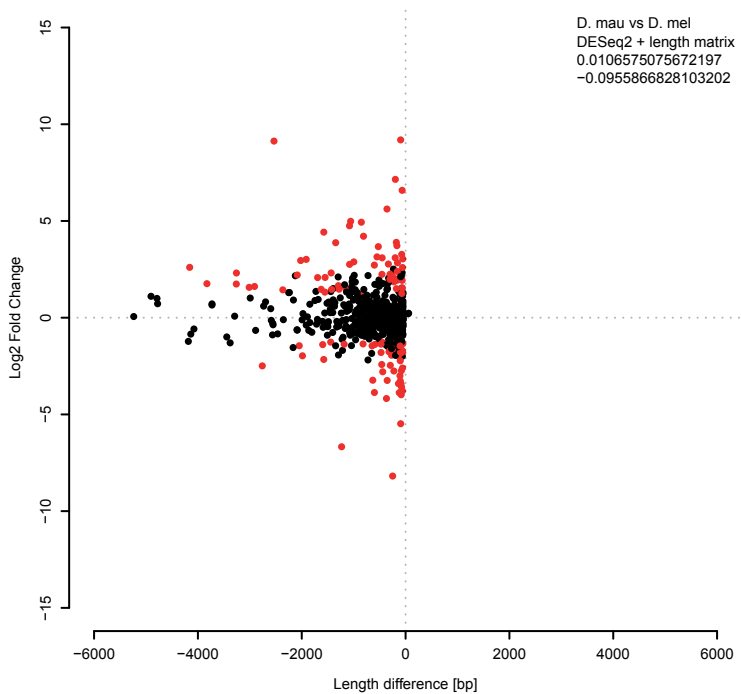

**Direct Annotation**

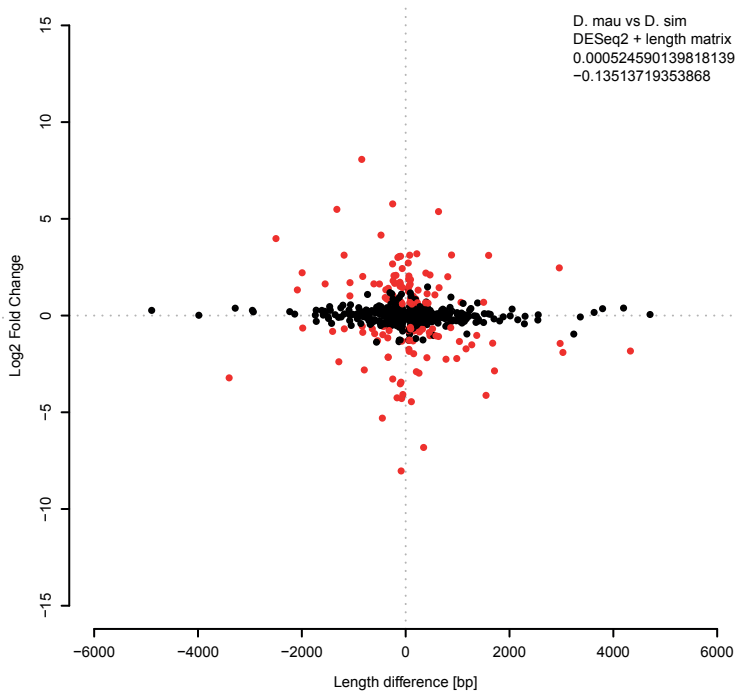

**Reciprocal Annotation**

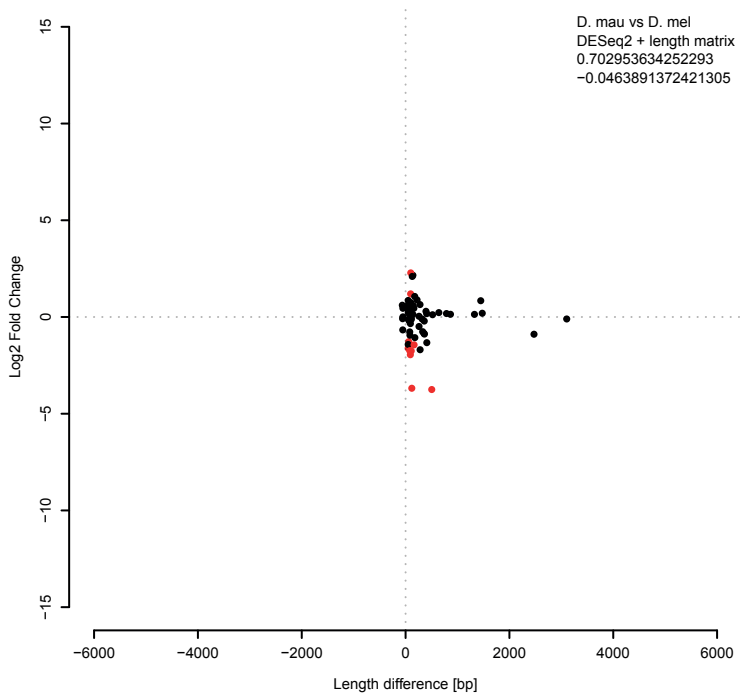

**Reciprocal Annotation**

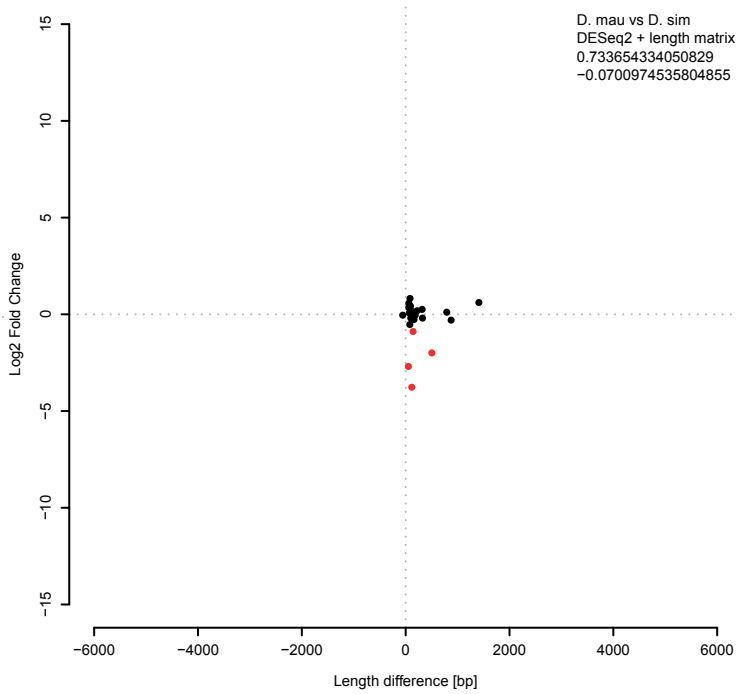

Supplement: 12864_2016_2646_MOESM4_ESM.pdf [file 12864_2016_2646_MOESM4_ESM.pdf]
