# Supplementary material for: A robust (re-)annotation approach to generate unbiased mapping references for RNA-seq-based analyses of differential expression across closely related species
Source: PubMed Central journal article supplement (PMC4877740; doi:10.1186/s12864-016-2646-x), 2016-05-24

**A**

Identity

*D. mau.* publ. Cp110*D. mau.* rec. re-ann. Cp110*D. mel.* Cp110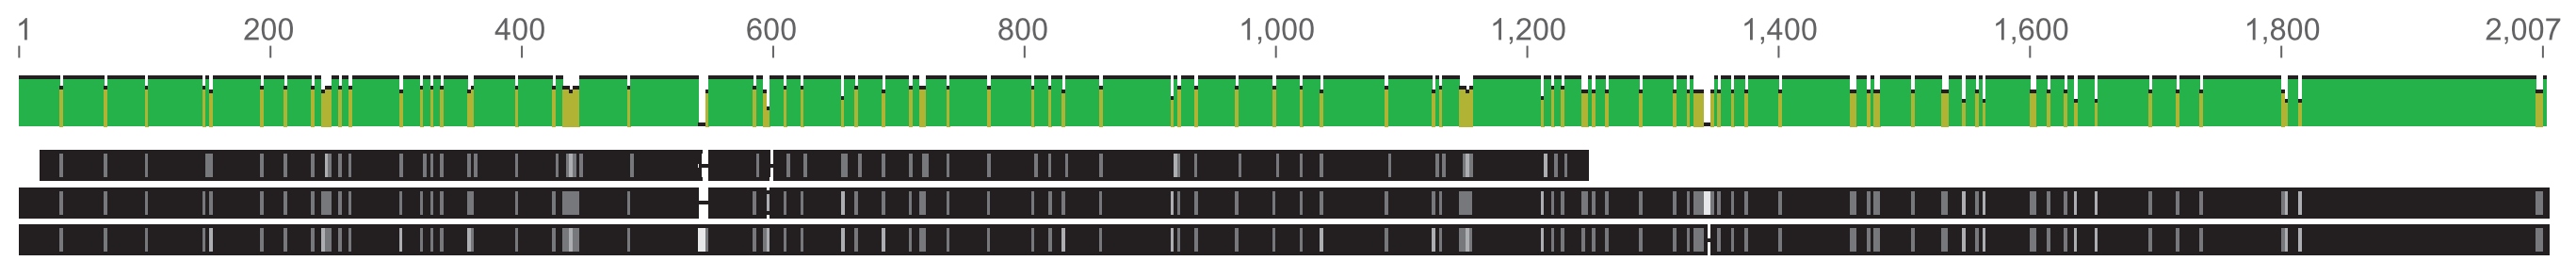**B**

*D. mauritiana*  
published  
RNA-seq  
mapped reads

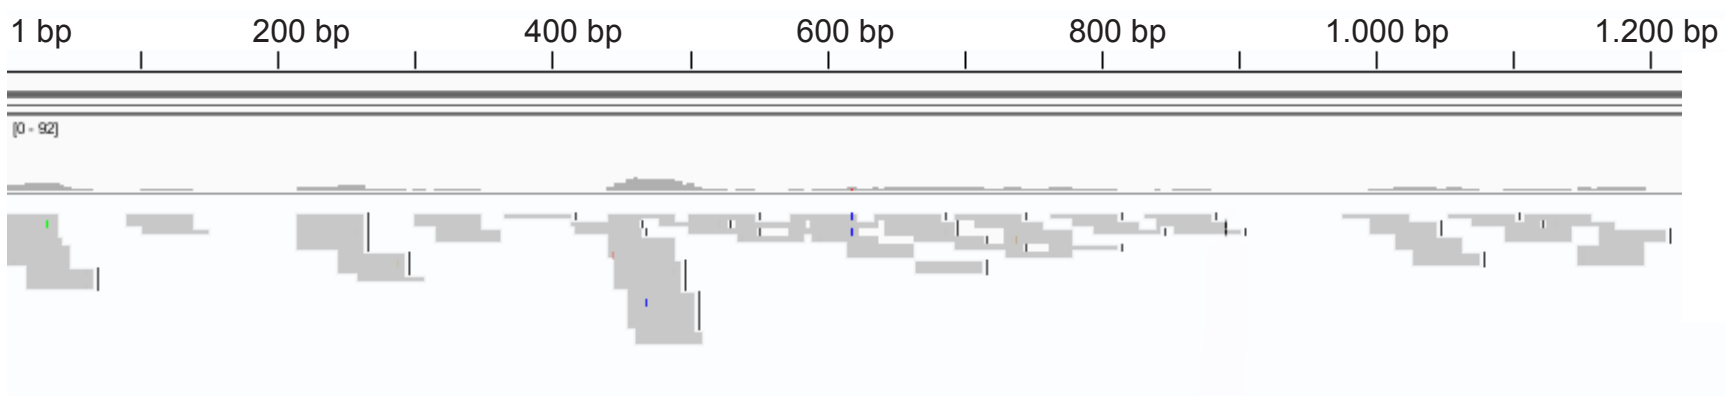**C**

*D. mauritiana*  
reciprocal re-ann.  
RNA-seq  
mapped reads

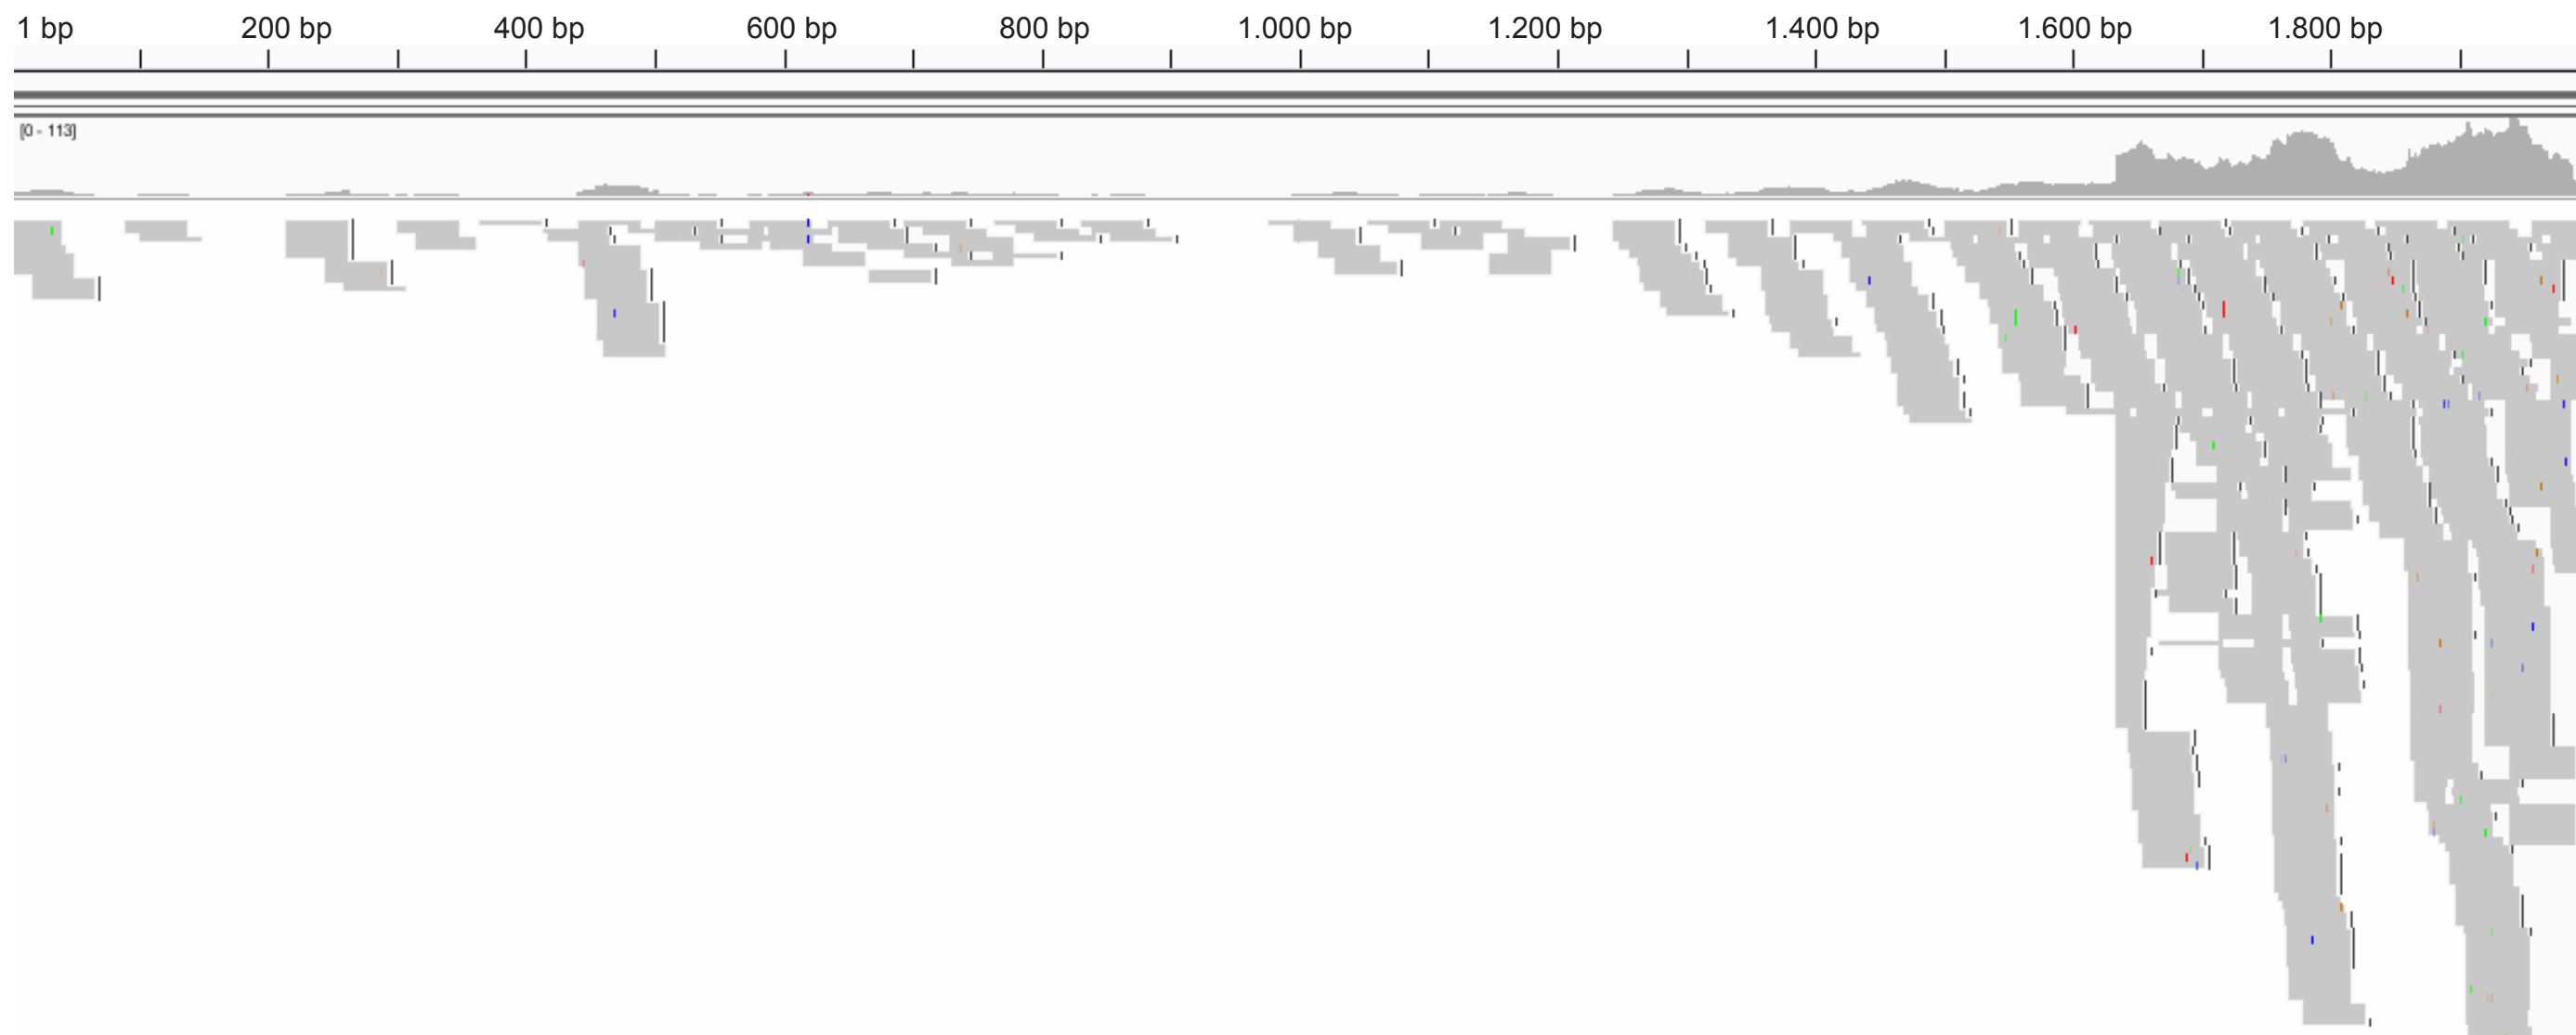**D**

*D. melanogaster*  
RNA-seq  
mapped reads

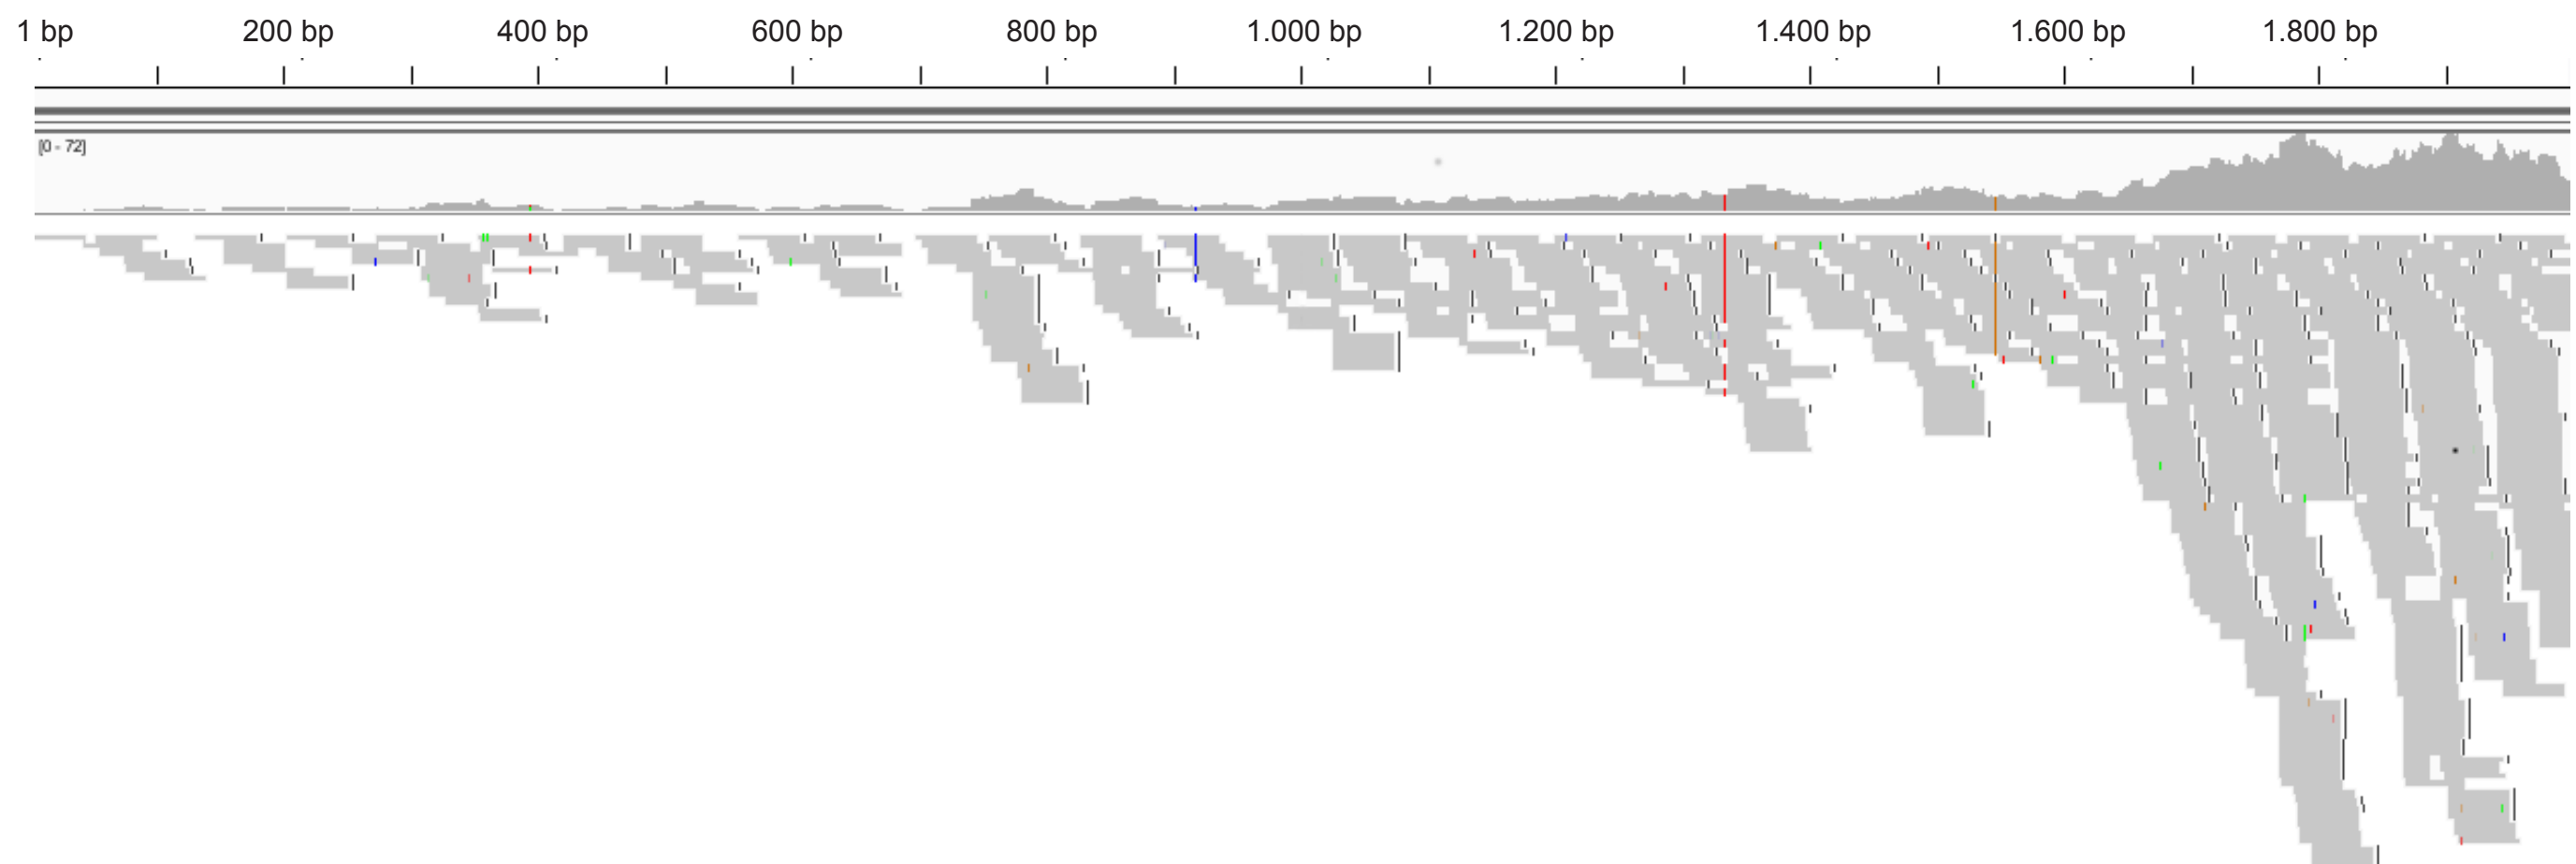

Supplement: 12864_2016_2646_MOESM7_ESM.pdf [file 12864_2016_2646_MOESM7_ESM.pdf]
